# Supplementary material for: Essential medicines wastage assessment in the Solomon Islands
Source: PLOS Glob Public Health. 2022 Feb 1;2(2):e0000181. doi: 10.1371/journal.pgph.0000181 (PMC10022118; doi:10.1371/journal.pgph.0000181)
Supplement: S1 Data — (XLSX) [file pgph.0000181.s001.xlsx]

## Sheet: Medicine stock 
Facility	Province	Medicine	Date	Years	Received from	Issued to	Pack	Quantity received	Balance in stock	Expired	Damaged	Other	Oth specify	total discard	Number of prescriptons	Remarks /source
603	HCC	ORS	2018-12-14	January 2018			1	500
		Vitamin A	2017-01-01	January 2017			1000	2
		Zn	2017-01-01	January 2017			100	20
		ORS	2018-01-01	January 2018			1	100
		Zn	2018-02-20	Febuary 2018			100	10
		ORS	2018-02-20	Febuary 2018			1	100
		ORS	2018-03-19	March 2018			1	1000
		Zn	2018-03-22	March 2018			100	10
		ORS	2018-03-22	March 2018			1	200
		Zn	2018-04-18	April 2018			100	10
		ORS	2018-04-18	April 2018			1	200
		Zn	2018-05-24	May 2018			100	10
		Zn	2018-06-25	June 2018			100	10
		ORS	2018-06-25	June 2018			1	200
		Albemdazole	2018-06-25	June 2018			1000	5
		Zn	2018-07-13	July 2018			100	20
		Zn	2018-07-19	July 2018			100	10
		ORS	2018-10-16	October 2018			1	500
		Zn	2018-11-16	November 2018				5000
		Albemdazole	2018-11-16	November 2018			1	10000
		Zn	2018-11-16	November 2018			10	5000
		Vitamin A	2018-11-16	November 2018			1000	1
		Zn	2017-02-28	Febuary 2017			10	1000
		ORS	2017-02-26	Febuary 2017			1	400
		Albemdazole	2017-03-01	March 2017			1000	5
		Vitamin A	2017-03-22	March 2017			1000	1
		Zn	2017-03-22	March 2017			10	8
		Zn	2017-09-26	September 2017			100	7
		Zn	2017-12-11	December 2017			100	10
		Zn	2017-10-03	October 2017			100	6
		Albemdazole	2017-10-03	October 2017			1000	10
		ORS	2017-10-18	October 2017			1	500
		Vitamin A	2017-10-18	October 2017			1000	5
		Zn	2017-08-01	August 2017				600
		ORS	2018-11-16					400

## Sheet: Medicine prescriptions 
Facility	Medicine	year	Total prescribed	Jan	Feb	Mar	Apr	May	Jun	Jul	Aug	Sep	Oct	Nov	Dec
602	Albendazole	2017	158	2	14	14	9	17	21	17	17	13	15	19	0
602	Albendazole	2018	261	10	16	33	14	23	9	18	36	25	34	34	9
602	Vitamin A	2018	125	5	8	12	7	11	6	12	11	4	26	18	5
602	Vitamin A	2017	151	5	21	2	11	11	16	17	16	15	17	20
602	Zinc	2017	143		9	13	8	12	18	10	14	9	10	39	1
602	Zinc	2018	87	3	8	5	3	7	2	5	8	11	9	19	7
602	ORS	2018	23	0	0	0	0	2	0	0	1	3	9	8	0
602	ORS	2017	77		11	11	1	11	11	11	1	1	7	12
504	ORS	2017	105	5	7	1	7	1	4	12	26	6	20	12	4
504	Albendazole	2017	266	7	10	30	18	33	23	32	33	16	24	23	17
504	Zinc	2017	303	13	10	6	15	24	23	28	55	21	40	40	28
504	ORS	2018	266	11	16	16	27	18	23	9	10	5	16	43	72
504	Albendazole	2018	694	45	50	46	66	94	116	78	26	39	43	44	47
504	Zinc	2018	542	54	48	37	68	52	44	24	23	19	43	98	32
504	Vitamin A	2017
504	Vitamin A	2018
603	Zinc	2017	224	29				7	13	40		16	24	61	34
603	ORS	2017	255	26				3	12	37		33	33	65	46
603	Albendazole	2017	260	30				1	11	63		23	31	68	33
603	Vitamin A	2017	37	2				0	0	3		14	1	11	6
603	ORS	2018	962	19	21	87	131	151	99	75	84	75	79	58	83
603	Zinc	2018	1156	20	16	121	169	137	97	84	109	113	114	92	84
603	Albendazole	2018	1764	49	54	163	210	262	179	147	182	166	161	100	91
603	Vitamin A	2018	254	2	4	15	25	31	16	22	37	31	35	20	16
601	Zinc	2017	805	44	57	80	63	71	41	38	64	84	104	114	45
601	ORS	2017	459	15	37	39	48	33	24	19	45	60	35	76	28
601	Albendazole	2017	753	48	67	81	70	28	65	53	102	107	30	68	34
601	Vitamin A	2017	123	4	3	3	4	3	12	12	27	28	4	12	11
601	Zinc	2018	449	117	4	0	33	44	30	29	34	38	73	36	11
601	Vitamin A	2018	230	129	0	0	1	15	12	26	7	1	25	11	3
601	Albendazole	2018	731	191	4	0	42	63	36	71	84	35	83	71	51
601	ORS	2018	272	23	1	0	28	37	23	26	22	21	45	35	11
703	Vitamin A	2017
703	Vitamin A	2018	8	7	1	0	0	0	0	0	0	0	0	0	0
703	Albendazole	2017	113	0	3	4	7	0	19	15	12	16	13	21	3
703	Albendazole	2018	171	7	19	7	5	15	13	9	12	10	29	28	17
703	ORS	2017	56	0	0	1	4	0	2	3	8	17	4	4	13
703	ORS	2018	10	5	0	0	1	0	1	0	1	0	1	1	0
703	Zinc	2017	54	0	0	1	6	0	5	5	8	8	0	0	21
703	Zinc	2018	67	11	3	0	0	0	7	15	2	3	13	6	7
701	Vitamin A	2017	16	1	0	2	0	1	3	0	2	0	4	1	2
701	Vitamin A	2018	28	1	2	5	0	2	2	4	4	0	2	4	2
701	Albendazole	2017	129	19	9	12	10	18	10	17	4	4	17	8	1
701	Albendazole	2018	109	7	9	16	4	7	2	6	6	12	11	20	9
701	ORS	2017	41	3	0	3	2	0	3	11	0	0	5	4	10
701	ORS	2018	34	8	1	11	4	1	0	0	1	0	2	2	4
701	Zinc	2017	70	13	1	9	6	7	8	4	1	1	4	7	9
701	Zinc	2018	89	12	6	20	9	10	2	2	2	2	5	10	9
402	Zinc	2017	63	1	1	1	5	2	4	4	4	4	5	4	28
402	Zinc	2018	57	9	2	2	3	21	6	10	0	2	0	2	0
402	ORS	2017	28	1	0	0	5	2	2	1	4	4	1	2	6
402	ORS	2018	33	0	0	0	4	10	3	13	0	1	0	2	0
402	Albendazole	2017	143	12	10	9	14	23	5	20	15	1	7	17	10
402	Albendazole	2018	208	9	9	20	18	28	23	33	24	15	21	7	1
402	Vitamin A	2017
402	Vitamin A	2018	2	0	0	0	1	0	0	1	0	0	0	0	0
405	Zinc	2017	386	61	23	13	56	27	40	39	17	53	18	18	21
405	Zinc	2018	441	79	21	32	38	58	31	10	12	21	42	50	47
405	ORS	2017	271	41	23	14	37	21	24	29	14	29	19	5	15
405	ORS	2018	326	64	18	18	37	35	30	16	9	14	18	27	40
405	Albendazole	2017	350	33	15	11	39	22	41	49	48	37	26	18	11
405	Albendazole	2018	453	46	25	37	47	92	26	21	7	12	26	48	66
405	Vitamin A	2017	2	1	0	0	0	0	1	0	0	0	0	0	0
405	Vitamin A	2018	1	1	0	0	0	0	0	0	0	0	0	0	0
403	Zinc	2017	31	5	4	2	2	3	2	2	5	3	1	2	0
403	Zinc	2018	72	0	1	1	4	16	5	9	8	10	5	7	6
403	ORS	2017	13	2	4	1	0	2	1	0	0	0	1	2	0
403	ORS	2018	31	0	0	0	1	6	1	5	5	5	0	2	6
403	Albendazole	2017	109	3	21	25	8	14	13	6	2	9	1	7	0
403	Albendazole	2018	79	0	4	13	3	7	9	3	12	7	9	9	3
403	Vitamin A	2017	1	0	0	0	0	0	1	0	0	0	0	0	0
403	Vitamin A	2018	5	0	0	4	0	0	0	0	1	0	0	0	0
704	Zinc	2018	36				4	3	1	0	1	4	12	3	8
704	ORS	2018	11				11	0	0	0	0	0	0	0	0
704	Albendazole	2018	75				4	10	13	2	9	9	15	7	6
704	Vitamin A	2018	0				0	0	0	0	0	0	0	0	0
705	Zinc	2018	29				3	4	4	0	0	0	17	0	1
705	ORS	2018	3					1	0	0	0	0	1	0	1
705	Albendazole	2018	24			1	4	6	5	0	0	0	5	0	3
705	Vitamin A	2018	11				3	3	1	0	0	0	4	0	0
401	Zinc	2018	6									4	2	0	0	Records for Jan-Jul not available, the nurse who look after the documented records locked all the documents in the document section and went to Australia.
401	ORS	2018	0								0	0	0	0	0
401	Albendazole	2018	99								10	20	29	14	26
401	Vitamin A	2018	1								0	1	0	0	0	Out Patient record for the months from Jan-Jul are missing.
404	Zinc	2017	14	0	0	0	1	0	0	5	0	1	1	4	2
404	Zinc	2018	32	3	3	1	1	4	2	1	4	2	1	5	5
404	ORS	2017	8	0	0	0	0	0	0	2	2	0	1	0	3
404	ORS	2018	0	0	0	0	0	0	0	0	0	0	0	0	0	Nil
404	Albendazole	2017	26	0	0	1	2	0	9	4	1	4	0	1	4
404	Albendazole	2018	48	3	2	9	7	9	3	1	4	1	7	2	0
404	Vitamin A	2017	0	0	0	0	0	0	0	0	0	0	0	0	0	Nil
404	Vitamin A	2018	1	0	1	0	0	0	0	0	0	0	0	0	0
801	Zinc	2017														2017 Out Patient Register book missing therefore no records available.
801	Zinc	2018	28					0	0	4	2	2	8	3	9
801	ORS	2017														2017 Out Patient Register book missing.
801	ORS	2018	7					0	0	2	0	0	1	1	3
801	Albendazole	2017	14									2	6	7	6
801	Albendazole	2018	156	4	3	6	2	93	5	8	6	6	8	9	6
801	Vitamin A	2017	14									2	6	4	2
801	Vitamin A	2018	128	4	3	10	3	81	2	4	4	6	2	7	2
501	ORS	2017	55	2	1	6	3	2	2	0	27	2	1	5	4
501	ORS	2018	16	4	1	0	2	0	1	1	1	0	0	4	2
501	Albendazole	2017	90	16	7	20	7	6	7	7	2	5	5	2	6
501	Albendazole	2018	186	4	9	20	16	27	10	8	17	19	21	28	7
702	Zinc	2017														no records recorded for the year 2017
702	Zinc	2018	142				4	18	9	11	14	17	30	22	17
702	ORS	2017														no records recorded for the year 2017
702	ORS	2018	4										1	1	2
702	Albendazole	2017														Records for 2017 is missing
702	Albendazole	2018	87				4	19	6	7	8	12	11	15	5
702	Vitamin A	2017														no records for 2017
702	Vitamin A	2018														no records for 2018
901	Zinc	2017	22		3	9						2		4	4	Records for some months in 2017 was missing
901	Zinc	2018	2	2												No records missing for some months.
901	ORS	2017	18		3	8				1	1	2		3		Missing records highlighted
901	ORS	2018	2	1										1
901	Albendazole	2017	6				1	1			1		1	2
901	Vitamin A	2018	1											1
902	Zinc	2017	90				1	9	7	8	5	15	13	14	18	no records for month jan to mar
902	Zinc	2018	85	19	5	13	7	3	3			8	4	7	24
902	ORS	2017	53				2	7	7	5	4	10	5	4	9
902	ORS	2018	30	8		6	1	2	5	2					6
902	Albendazole	2017	202				10	28	13	23	20	23	23	30	32
902	Albendazole	2018	222	27	16	23	9	8	22	26	37	2	12	15	25
902	Vitamin A	2017	7										2	2	3
902	Vitamin A	2018	9	3	2	1				1					1
502	Zinc	2017	11					3	6		1	3	4
502	Zinc	2018	29			1		12	1	1		3	4	3	4
502	ORS	2017	14					3	3		1	1	6
502	ORS	2018	11			3		4			1		1		2
502	Albendazole	2017	59	1	3	5	5	6	5	4	6	12	6	5	1
502	Albendazole	2018	158			7	8	11	8	5	51	22	13	32	1
502	Vitamin A	2017	8			4	2	1							1
502	Vitamin A	2018	118				2	4	3	2	52	13	11	29	2
501	Vitamin A	2017	17		1	16
501	Vitamin A	2018	2			2
501	Zinc	2017	23	7	4	12
501	Zinc	2018	10	1	4	5

## Sheet: Facility survey 
Facility code	Date	Zinc_count	Zinc_expired	Zinc_exp date	Zn_record date	ZN_last stock	ORS_count	ORS_expired	ORS_expiy date	ORS_last record date	ORS_last stock	Vit A_ count	VitA_expired	VitaminA_exp date	VitA_last record	VitA_ last stock	Albendazole_count	Albendazole_expired	Albendazole exp date	Albendazole_las=t record	Albendazoel_ last stock
401	2019-08-16	0					0	1000	2019-04-01			1900		2021-11-01			1000		2021-04-01
402	2019-08-13	300	0	2020-05-01	norecord	norecords	32	32	2019-04-01			140	0	2019-09-01			700	500	01/07/2020, 02/2019			500 has expiray date feb 2019
403	2019-08-12	0					0	100	2019-04-01			90	0	2019-09-01			400	0	2020-07-01			nurse not around therefore missing info, no penta ana Pcv in fridge all bcg expiresed , 10 opv vvm 4
404	2019-08-19	550			2019-07-01		0					1900					1900
405	2019-08-13	na																				medicines stock person in charge not avaiable
501	2019-08-13	90		2020-04-01			0					5700		2019-09-01			1100		2019-10-01
502	2019-08-22	708		2020-03-01			0	95	2019-04-01			0	1100	2019-09-01			2500	0	2021-06-01
503	2019-09-13	300	0				0					1000	0				160	0
504	2019-07-30
601	2019-07-31	97	0	2020-04-01	2019-07-15	25	48	0	2021-09-19	2019-07-15	262	800	0	2019-09-01	2019-07-15	850	900	0	2021-06-01	2019-07-15	1370
602	2019-07-30	560	0	2021-09-01			100	11	2021-09-01			900	0	2019-09-01			3000	2000	2022-02-01
603	2019-07-31	605	0	2020-04-01			510	0				8750	0	2019-09-01			3000	0	2022-02-01
701	2019-08-12	1300	0	2020-07-01	2019-07-19	300	4	0	2021-09-29	2019-07-19	2000	2500	0	2019-09-01	2019-07-19	2000	0	850	2019-02-01	2019-07-19	15000
702	2019-08-13	410		2020-08-01			0	974	2019-04-01			2500		2019-09-01			7078		2021-06-01
703	2019-08-12	0	0		2019-07-04	200	0	160	05/2019 + 03/018, +	2019-07-04	80	2500	0	2019-09-01	2019-07-04	1000	2500	0	2021-08-01	2019-07-04	2000
704	2019-08-13	50		2020-08-01			0					250		2019-09-01			500		2021-06-01
705	2019-08-13	55	0	2020-04-01			0	152	2018-08-12			350		2019-09-01			0
706	2019-08-12	20000	0	2020-04-01			3000	0	2023-09-24			14000	0	2019-09-01			80000		2020-07-01
801	2019-08-12	300		2020-05-01			400	100				4800					4930
802	2019-08-15	560					0	100	2019-04-01			900		2019-09-01			1500		2021-06-01
901	2019-08-23	0					0	71	2019-04-01			1000		2019-09-01			1000		2020-07-01
902	2019-08-23	0	0				104		2021-09-24			17000		2019-09-01			1000		2021-06-01
												64940

## Sheet: Medicine prescriptions  (2)
Facility	year	Medicine	Jan	Feb	Mar	Apr	May	Jun	Jul	Aug	Sep	Oct	Nov	Dec	Total
602	2017	1		9	13	8	12	18	10	14	9	10	39	1	143
		2		11	11	1	11	11	11	1	1	7	12		77
		3	2	14	14	9	17	21	17	17	13	15	19	0	158
		4	5	21	2	11	11	16	17	16	15	17	20		151
	2018	1	3	8	5	3	7	2	5	8	11	9	19	7	87
		2	0	0	0	0	2	0	0	1	3	9	8	0	23
		3	10	16	33	14	23	9	18	36	25	34	34	9	261
		4	5	8	12	7	11	6	12	11	4	26	18	5	125
504	2017	2	5	7	1	7	1	4	12	26	6	20	12	4	105
	2017	3	7	10	30	18	33	23	32	33	16	24	23	17	266
	2017	1	13	10	6	15	24	23	28	55	21	40	40	28	303
	2018	2	11	16	16	27	18	23	9	10	5	16	43	72	266
	2018	3	45	50	46	66	94	116	78	26	39	43	44	47	694
	2018	1	54	48	37	68	52	44	24	23	19	43	98	32	542
	2017	4
	2018	4
603	2017	1	29				7	13	40		16	24	61	34	224
603	2017	2	26				3	12	37		33	33	65	46	255
603	2017	3	30				1	11	63		23	31	68	33	260
603	2017	4	2				0	0	3		14	1	11	6	37
603	2018	2	19	21	87	131	151	99	75	84	75	79	58	83	962
603	2018	1	20	16	121	169	137	97	84	109	113	114	92	84	1156
603	2018	3	49	54	163	210	262	179	147	182	166	161	100	91	1764
603	2018	4	2	4	15	25	31	16	22	37	31	35	20	16	254
601	2017	1	44	57	80	63	71	41	38	64	84	104	114	45	805
601	2017	2	15	37	39	48	33	24	19	45	60	35	76	28	459
601	2017	3	48	67	81	70	28	65	53	102	107	30	68	34	753
601	2017	4	4	3	3	4	3	12	12	27	28	4	12	11	123
601	2018	1	117	4	0	33	44	30	29	34	38	73	36	11	449
601	2018	4	129	0	0	1	15	12	26	7	1	25	11	3	230
601	2018	3	191	4	0	42	63	36	71	84	35	83	71	51	731
601	2018	2	23	1	0	28	37	23	26	22	21	45	35	11	272
703	2017	4	0	0	0	0	0	0	0	0	0	0	0	0	0
703	2018	4	7	1	0	0	0	0	0	0	0	0	0	0	8
703	2017	3	0	3	4	7	0	19	15	12	16	13	21	3	113
703	2018	3	7	19	7	5	15	13	9	12	10	29	28	17	171
703	2017	2	0	0	1	4	0	2	3	8	17	4	4	13	56
703	2018	2	5	0	0	1	0	1	0	1	0	1	1	0	10
703	2017	1	0	0	1	6	0	5	5	8	8	0	0	21	54
703	2018	1	11	3	0	0	0	7	15	2	3	13	6	7	67
701	2017	4	1	0	2	0	1	3	0	2	0	4	1	2	16
701	2018	4	1	2	5	0	2	2	4	4	0	2	4	2	28
701	2017	3	19	9	12	10	18	10	17	4	4	17	8	1	129
701	2018	3	7	9	16	4	7	2	6	6	12	11	20	9	109
701	2017	2	3	0	3	2	0	3	11	0	0	5	4	10	41
701	2018	2	8	1	11	4	1	0	0	1	0	2	2	4	34
701	2017	1	13	1	9	6	7	8	4	1	1	4	7	9	70
701	2018	1	12	6	20	9	10	2	2	2	2	5	10	9	89
402	2017	1	1	1	1	5	2	4	4	4	4	5	4	28	63
402	2018	1	9	2	2	3	21	6	10	0	2	0	2	0	57
402	2017	2	1	0	0	5	2	2	1	4	4	1	2	6	28
402	2018	2	0	0	0	4	10	3	13	0	1	0	2	0	33
402	2017	3	12	10	9	14	23	5	20	15	1	7	17	10	143
402	2018	3	9	9	20	18	28	23	33	24	15	21	7	1	208
402	2017	4	0	0	0	0	0	0	0	0	0	0	0	0
402	2018	4	0	0	0	1	0	0	1	0	0	0	0	0	2
405	2017	1	61	23	13	56	27	40	39	17	53	18	18	21	386
405	2018	1	79	21	32	38	58	31	10	12	21	42	50	47	441
405	2017	2	41	23	14	37	21	24	29	14	29	19	5	15	271
405	2018	2	64	18	18	37	35	30	16	9	14	18	27	40	326
405	2017	3	33	15	11	39	22	41	49	48	37	26	18	11	350
405	2018	3	46	25	37	47	92	26	21	7	12	26	48	66	453
405	2017	4	1	0	0	0	0	1	0	0	0	0	0	0	2
405	2018	4	1	0	0	0	0	0	0	0	0	0	0	0	1
403	2017	1	5	4	2	2	3	2	2	5	3	1	2	0	31
403	2018	1	0	1	1	4	16	5	9	8	10	5	7	6	72
403	2017	2	2	4	1	0	2	1	0	0	0	1	2	0	13
403	2018	2	0	0	0	1	6	1	5	5	5	0	2	6	31
403	2017	3	3	21	25	8	14	13	6	2	9	1	7	0	109
403	2018	3	0	4	13	3	7	9	3	12	7	9	9	3	79
403	2017	4	0	0	0	0	0	1	0	0	0	0	0	0	1
403	2018	4	0	0	4	0	0	0	0	1	0	0	0	0	5
702	2017	1														no records recorded for the year 2017
702	2018	1				4	18	9	11	14	17	30	22	17	142
702	2017	2														no records recorded for the year 2017
702	2018	2										1	1	2	4
702	2017	3														Records for 2017 is missing
702	2018	3				4	19	6	7	8	12	11	15	5	87
702	2017	4														no records for 2017
702	2018	4														no records for 2018
901	2017	1		3	9						2		4	4	22	Records for some months in 2017 was missing
901	2018	1	2												2	No records missing for some months.
901	2017	2		3	8				1	1	2		3		18	Missing records highlighted
901	2018	2	1										1		2
901	2017	3				1	1			1		1	2		6
901	2018	4											1		1
902	2017	1				1	9	7	8	5	15	13	14	18	90	no records for month jan to mar
902	2018	1	19	5	13	7	3	3			8	4	7	24	85
902	2017	2				2	7	7	5	4	10	5	4	9	53
902	2018	2	8		6	1	2	5	2					6	30
902	2017	3				10	28	13	23	20	23	23	30	32	202
902	2018	3	27	16	23	9	8	22	26	37	2	12	15	25	222
902	2017	4										2	2	3	7
902	2018	4	3	2	1				1					1	9
502	2017	1					3	6		1	3	4			11
502	2018	1			1		12	1	1		3	4	3	4	29
502	2017	2					3	3		1	1	6			14
502	2018	2			3		4			1		1		2	11
502	2017	3	1	3	5	5	6	5	4	6	12	6	5	1	59
502	2018	3			7	8	11	8	5	51	22	13	32	1	158
502	2017	4			4	2	1							1	8
502	2018	4				2	4	3	2	52	13	11	29	2	118
501	2017	4		1	16										17
501	2018	4			2										2
501	2017	1	7	4	12										23
501	2018	1	1	4	5										10
503	2017	1														No records for both years.
503	2018	1
503	2017	2
503	2018	2
503	2017	3
503	2018	3
503	2017	4
503	2018	4
704	2017	1234	999	999	999	999	999	999	999	999	999	999	999	999	999	2017 Out Patient Register book missing therefore no records available. Bin cards also missing.
704	2018	1				4	3	1	0	1	4	12	3	8	36
704	2018	2				11	0	0	0	0	0	0	0	0	11
704	2018	3				4	10	13	2	9	9	15	7	6	75
704	2018	4				0	0	0	0	0	0	0	0	0	0
705	2017	999	999	999	999	999	999	999	999	999	999	999	999	999	999	2017 Out Patient Register book missing therefore no records available. Bin cards also missing.
705	2018	1				3	4	4	0	0	0	17	0	1	29
705	2018	2					1	0	0	0	0	1	0	1	3
705	2018	3			1	4	6	5	0	0	0	5	0	3	24
705	2018	4				3	3	1	0	0	0	4	0	0	11
401	2017	999	999	999	999	999	999	999	999	999	999	999	999	999	999	2017 Out Patient Register book missing therefore no records available. Bin cards & Stock Order forms are also missing.
401	2018	1									4	2	0	0	6	Records for Jan-Jul not available, the nurse who look after the documented records locked all the documents in the document section and went to Australia.
401	2018	2													0	Nil
401	2018	3								10	20	29	14	26	99
401	2018	4								0	1	0	0	0	1	Out Patient record for the months from Jan-Jul are missing.
404	2017	1				1	0	0	5	0	1	1	4	2	14
404	2018	1	3	3	1	1	4	2	1	4	2	1	5	5	32
404	2017	2							2	2	0	1	0	3	8
404	2018	2													0	Nil
404	2017	3			1	2	0	9	4	1	4	0	1	4	26
404	2018	3	3	2	9	7	9	3	1	4	1	7	2	0	48
404	2017	4													0	Nil
404	2018	4	0	1	0	0	0	0	0	0	0	0	0	0	1
801	2017	1	999	999	999	999	999	999	999	999	999	999	999	999	999	2017 Out Patient Register book missing therefore no records available.
801	2018	1					0	0	4	2	2	8	3	9	28
801	2017	2	999	999	999	999	999	999	999	999	999	999	999	999	999	2017 Out Patient Register book missing therefore no records available.
801	2018	2					0	0	2	0	0	1	1	3	7
801	2017	3									2	6	7	6	14
801	2018	3	4	3	6	2	93	5	8	6	6	8	9	6	156
801	2017	4									2	6	4	2	14
801	2018	4	4	3	10	3	81	2	4	4	6	2	7	2	128
802	2017	999	999	999	999	999	999	999	999	999	999	999	999	999	999	2017 Out Patient Register book & Medicine Stock Record Book are not available in this facility (nurses present at the clinic said that all the books were burnt when a clean up work was done in the clinic)
802	2018	999	999	999	999	999	999	999	999	999	999	999	999	999	999	2017 Out Patient Register book & Medicine Stock Record Book are not available in this facility (nurses present at the clinic said that all the books were burnt when a clean up work was done in the clinic)
501	2017	2	2	1	6	3	2	2	0	27	2	1	5	4	55
501	2018	2	4	1	0	2	0	1	1	1	0	0	4	2	16
501	2017	3	16	7	20	7	6	7	7	2	5	5	2	6	90
501	2018	3	4	9	20	16	27	10	8	17	19	21	28	7	186

## Sheet: Summary
id	Facility	year	month	meds_count	Total	Medicine
1	602	2017	Jan	2	158	3
1			Feb	14	158	3
1			Mar	14	158	3
1			Apr	9	158	3
1			May	17	158	3
1			Jun	21	158	3
1			Jul	17	158	3
1			Aug	17	158	3
1			Sep	13	158	3
1			Oct	15	158	3
1			Nov	19	158	3
1			Dec	0	158	3
2		2018	Jan	10	261	3
2			Feb	16	261	3
2			Mar	33	261	3
2			Apr	14	261	3
2			May	23	261	3
2			Jun	9	261	3
2			Jul	18	261	3
2			Aug	36	261	3
2			Sep	25	261	3
2			Oct	34	261	3
2			Nov	34	261	3
2			Dec	9	261	3
3	602	2018	Jan	5	125	4
3	602	2018	Feb	8	125	4
3	602	2018	Mar	12	125	4
3	602	2018	Apr	7	125	4
3	602	2018	May	11	125	4
3	602	2018	Jun	6	125	4
3	602	2018	Jul	12	125	4
3	602	2018	Aug	11	125	4
3	602	2018	Sep	4	125	4
3	602	2018	Oct	26	125	4
3	602	2018	Nov	18	125	4
3	602	2018	Dec	5	125	4
4	602	2017	1	5	151	4
4	602	2017	2	21	151	4
4	602	2017	3	2	151	4
4	602	2017	4	11	151	4
4	602	2017	5	11	151	4
4	602	2017	6	16	151	4
4	602	2017	7	17	151	4
4	602	2017	8	16	151	4
4	602	2017	9	15	151	4
4	602	2017	10	17	151	4
4	602	2017	11	20	151	4
4	602	2017	12		151	4
5	602	2017	1		143	1
5	602	2017	2	9	143	1
5	602	2017	3	13	143	1
5	602	2017	4	8	143	1
5	602	2017	5	12	143	1
5	602	2017	6	18	143	1
5	602	2017	7	10	143	1
5	602	2017	8	14	143	1
5	602	2017	9	9	143	1
5	602	2017	10	10	143	1
5	602	2017	11	39	143	1
5	602	2017	12	1	143	1
6	602	2018	1	3	87	1
6	602	2018	2	8	87	1
6	602	2018	3	5	87	1
6	602	2018	4	3	87	1
6	602	2018	5	7	87	1
6	602	2018	6	2	87	1
6	602	2018	7	5	87	1
6	602	2018	8	8	87	1
6	602	2018	9	11	87	1
6	602	2018	10	9	87	1
6	602	2018	11	19	87	1
6	602	2018	12	7	87	1
7	602	2018	1	0	23	2
7	602	2018	2	0	23	2
7	602	2018	3	0	23	2
7	602	2018	4	0	23	2
7	602	2018	5	2	23	2
7	602	2018	6	0	23	2
7	602	2018	7	0	23	2
7	602	2018	8	1	23	2
7	602	2018	9	3	23	2
7	602	2018	10	9	23	2
7	602	2018	11	8	23	2
7	602	2018	12	0	23	2
8	602	2017	1		77	2
8	602	2017	2	11	77	2
8	602	2017	3	11	77	2
8	602	2017	4	1	77	2
8	602	2017	5	11	77	2
8	602	2017	6	11	77	2
8	602	2017	7	11	77	2
8	602	2017	8	1	77	2
8	602	2017	9	1	77	2
8	602	2017	10	7	77	2
8	602	2017	11	12	77	2
8	602	2017	12		77	2
9	602	2018	1			4
9	602	2018	2			4
9	602	2018	3			4
9	602	2018	4			4
9	602	2018	5			4
9	602	2018	6			4
9	602	2018	7			4
9	602	2018	8			4
9	602	2018	9			4
9	602	2018	10			4
9	602	2018	11			4
9	602	2018	12			4
10	504	2017	1	5	105	2
10	504	2017	2	7	105	2
10	504	2017	3	1	105	2
10	504	2017	4	7	105	2
10	504	2017	5	1	105	2
10	504	2017	6	4	105	2
10	504	2017	7	12	105	2
10	504	2017	8	26	105	2
10	504	2017	9	6	105	2
10	504	2017	10	20	105	2
10	504	2017	11	12	105	2
10	504	2017	12	4	105	2
11	504	2017	1	7	266	3
11	504	2017	2	10	266	3
11	504	2017	3	30	266	3
11	504	2017	4	18	266	3
11	504	2017	5	33	266	3
11	504	2017	6	23	266	3
11	504	2017	7	32	266	3
11	504	2017	8	33	266	3
11	504	2017	9	16	266	3
11	504	2017	10	24	266	3
11	504	2017	11	23	266	3
11	504	2017	12	17	266	3
12	504	2017	1	13	303	1
12	504	2017	2	10	303	1
12	504	2017	3	6	303	1
12	504	2017	4	15	303	1
12	504	2017	5	24	303	1
12	504	2017	6	23	303	1
12	504	2017	7	28	303	1
12	504	2017	8	55	303	1
12	504	2017	9	21	303	1
12	504	2017	10	40	303	1
12	504	2017	11	40	303	1
12	504	2017	12	28	303	1
13	504	2018	1	11	266	2
13	504	2018	2	16	266	2
13	504	2018	3	16	266	2
13	504	2018	4	27	266	2
13	504	2018	5	18	266	2
13	504	2018	6	23	266	2
13	504	2018	7	9	266	2
13	504	2018	8	10	266	2
13	504	2018	9	5	266	2
13	504	2018	10	16	266	2
13	504	2018	11	43	266	2
13	504	2018	12	72	266	2
14	504	2018	1	45	694	3
14	504	2018	2	50	694	3
14	504	2018	3	46	694	3
14	504	2018	4	66	694	3
14	504	2018	5	94	694	3
14	504	2018	6	116	694	3
14	504	2018	7	78	694	3
14	504	2018	8	26	694	3
14	504	2018	9	39	694	3
14	504	2018	10	43	694	3
14	504	2018	11	44	694	3
14	504	2018	12	47	694	3
15	504	2018	1	54	542	1
15	504	2018	2	48	542	1
15	504	2018	3	37	542	1
15	504	2018	4	68	542	1
15	504	2018	5	52	542	1
15	504	2018	6	44	542	1
15	504	2018	7	24	542	1
15	504	2018	8	23	542	1
15	504	2018	9	19	542	1
15	504	2018	10	43	542	1
15	504	2018	11	98	542	1
15	504	2018	12	32	542	1
16	504	2017	1			4
16	504	2017	2			4
16	504	2017	3			4
16	504	2017	4			4
16	504	2017	5			4
16	504	2017	6			4
16	504	2017	7			4
16	504	2017	8			4
16	504	2017	9			4
16	504	2017	10			4
16	504	2017	11			4
16	504	2017	12			4
17	504	2018	1			4
17	504	2018	2			4
17	504	2018	3			4
17	504	2018	4			4
17	504	2018	5			4
17	504	2018	6			4
17	504	2018	7			4
17	504	2018	8			4
17	504	2018	9			4
17	504	2018	10			4
17	504	2018	11			4
17	504	2018	12			4
18	603	2017	1	29	224	1
18	603	2017	2		224	1
18	603	2017	3		224	1
18	603	2017	4		224	1
18	603	2017	5	7	224	1
18	603	2017	6	13	224	1
18	603	2017	7	40	224	1
18	603	2017	8		224	1
18	603	2017	9	16	224	1
18	603	2017	10	24	224	1
18	603	2017	11	61	224	1
18	603	2017	12	34	224	1
19	603	2017	1	26	255	2
19	603	2017	2		255	2
19	603	2017	3		255	2
19	603	2017	4		255	2
19	603	2017	5	3	255	2
19	603	2017	6	12	255	2
19	603	2017	7	37	255	2
19	603	2017	8		255	2
19	603	2017	9	33	255	2
19	603	2017	10	33	255	2
19	603	2017	11	65	255	2
19	603	2017	12	46	255	2
20	603	2017	1	30	260	3
20	603	2017	2		260	3
20	603	2017	3		260	3
20	603	2017	4		260	3
20	603	2017	5	1	260	3
20	603	2017	6	11	260	3
20	603	2017	7	63	260	3
20	603	2017	8		260	3
20	603	2017	9	23	260	3
20	603	2017	10	31	260	3
20	603	2017	11	68	260	3
20	603	2017	12	33	260	3
21	603	2017	1	2	37	4
21	603	2017	2		37	4
21	603	2017	3		37	4
21	603	2017	4		37	4
21	603	2017	5	0	37	4
21	603	2017	6	0	37	4
21	603	2017	7	3	37	4
21	603	2017	8		37	4
21	603	2017	9	14	37	4
21	603	2017	10	1	37	4
21	603	2017	11	11	37	4
21	603	2017	12	6	37	4
22	603	2018	1	19	962	2
22	603	2018	2	21	962	2
22	603	2018	3	87	962	2
22	603	2018	4	131	962	2
22	603	2018	5	151	962	2
22	603	2018	6	99	962	2
22	603	2018	7	75	962	2
22	603	2018	8	84	962	2
22	603	2018	9	75	962	2
22	603	2018	10	79	962	2
22	603	2018	11	58	962	2
22	603	2018	12	83	962	2
23	603	2018	1	20	1156	1
23	603	2018	2	16	1156	1
23	603	2018	3	121	1156	1
23	603	2018	4	169	1156	1
23	603	2018	5	137	1156	1
23	603	2018	6	97	1156	1
23	603	2018	7	84	1156	1
23	603	2018	8	109	1156	1
23	603	2018	9	113	1156	1
23	603	2018	10	114	1156	1
23	603	2018	11	92	1156	1
23	603	2018	12	84	1156	1
24	603	2018	1	49	1764	3
24	603	2018	2	54	1764	3
24	603	2018	3	163	1764	3
24	603	2018	4	210	1764	3
24	603	2018	5	262	1764	3
24	603	2018	6	179	1764	3
24	603	2018	7	147	1764	3
24	603	2018	8	182	1764	3
24	603	2018	9	166	1764	3
24	603	2018	10	161	1764	3
24	603	2018	11	100	1764	3
24	603	2018	12	91	1764	3
25	603	2018	1	2	254	4
25	603	2018	2	4	254	4
25	603	2018	3	15	254	4
25	603	2018	4	25	254	4
25	603	2018	5	31	254	4
25	603	2018	6	16	254	4
25	603	2018	7	22	254	4
25	603	2018	8	37	254	4
25	603	2018	9	31	254	4
25	603	2018	10	35	254	4
25	603	2018	11	20	254	4
25	603	2018	12	16	254	4
26	601	2017	1	44	805	1
26	601	2017	2	57	805	1
26	601	2017	3	80	805	1
26	601	2017	4	63	805	1
26	601	2017	5	71	805	1
26	601	2017	6	41	805	1
26	601	2017	7	38	805	1
26	601	2017	8	64	805	1
26	601	2017	9	84	805	1
26	601	2017	10	104	805	1
26	601	2017	11	114	805	1
26	601	2017	12	45	805	1
27	601	2017	1	15	459	2
27	601	2017	2	37	459	2
27	601	2017	3	39	459	2
27	601	2017	4	48	459	2
27	601	2017	5	33	459	2
27	601	2017	6	24	459	2
27	601	2017	7	19	459	2
27	601	2017	8	45	459	2
27	601	2017	9	60	459	2
27	601	2017	10	35	459	2
27	601	2017	11	76	459	2
27	601	2017	12	28	459	2
28	601	2017	1	48	753	3
28	601	2017	2	67	753	3
28	601	2017	3	81	753	3
28	601	2017	4	70	753	3
28	601	2017	5	28	753	3
28	601	2017	6	65	753	3
28	601	2017	7	53	753	3
28	601	2017	8	102	753	3
28	601	2017	9	107	753	3
28	601	2017	10	30	753	3
28	601	2017	11	68	753	3
28	601	2017	12	34	753	3
29	601	2017	1	4	123	4
29	601	2017	2	3	123	4
29	601	2017	3	3	123	4
29	601	2017	4	4	123	4
29	601	2017	5	3	123	4
29	601	2017	6	12	123	4
29	601	2017	7	12	123	4
29	601	2017	8	27	123	4
29	601	2017	9	28	123	4
29	601	2017	10	4	123	4
29	601	2017	11	12	123	4
29	601	2017	12	11	123	4
30	601	2018	1	117	449	1
30	601	2018	2	4	449	1
30	601	2018	3	0	449	1
30	601	2018	4	33	449	1
30	601	2018	5	44	449	1
30	601	2018	6	30	449	1
30	601	2018	7	29	449	1
30	601	2018	8	34	449	1
30	601	2018	9	38	449	1
30	601	2018	10	73	449	1
30	601	2018	11	36	449	1
30	601	2018	12	11	449	1
31	601	2018	1	129	230	4
31	601	2018	2	0	230	4
31	601	2018	3	0	230	4
31	601	2018	4	1	230	4
31	601	2018	5	15	230	4
31	601	2018	6	12	230	4
31	601	2018	7	26	230	4
31	601	2018	8	7	230	4
31	601	2018	9	1	230	4
31	601	2018	10	25	230	4
31	601	2018	11	11	230	4
31	601	2018	12	3	230	4
32	601	2018	1	191	731	3
32	601	2018	2	4	731	3
32	601	2018	3	0	731	3
32	601	2018	4	42	731	3
32	601	2018	5	63	731	3
32	601	2018	6	36	731	3
32	601	2018	7	71	731	3
32	601	2018	8	84	731	3
32	601	2018	9	35	731	3
32	601	2018	10	83	731	3
32	601	2018	11	71	731	3
32	601	2018	12	51	731	3
33	601	2018	1	23	272	2
33	601	2018	2	1	272	2
33	601	2018	3	0	272	2
33	601	2018	4	28	272	2
33	601	2018	5	37	272	2
33	601	2018	6	23	272	2
33	601	2018	7	26	272	2
33	601	2018	8	22	272	2
33	601	2018	9	21	272	2
33	601	2018	10	45	272	2
33	601	2018	11	35	272	2
33	601	2018	12	11	272	2
34	703	2017	1	0	0	4
34	703	2017	2	0	0	4
34	703	2017	3	0	0	4
34	703	2017	4	0	0	4
34	703	2017	5	0	0	4
34	703	2017	6	0	0	4
34	703	2017	7	0	0	4
34	703	2017	8	0	0	4
34	703	2017	9	0	0	4
34	703	2017	10	0	0	4
34	703	2017	11	0	0	4
34	703	2017	12	0	0	4
35	703	2018	1	7	8	4
35	703	2018	2	1	8	4
35	703	2018	3	0	8	4
35	703	2018	4	0	8	4
35	703	2018	5	0	8	4
35	703	2018	6	0	8	4
35	703	2018	7	0	8	4
35	703	2018	8	0	8	4
35	703	2018	9	0	8	4
35	703	2018	10	0	8	4
35	703	2018	11	0	8	4
35	703	2018	12	0	8	4
36	703	2017	1	0	113	3
36	703	2017	2	3	113	3
36	703	2017	3	4	113	3
36	703	2017	4	7	113	3
36	703	2017	5	0	113	3
36	703	2017	6	19	113	3
36	703	2017	7	15	113	3
36	703	2017	8	12	113	3
36	703	2017	9	16	113	3
36	703	2017	10	13	113	3
36	703	2017	11	21	113	3
36	703	2017	12	3	113	3
37	703	2018	1	7	171	3
37	703	2018	2	19	171	3
37	703	2018	3	7	171	3
37	703	2018	4	5	171	3
37	703	2018	5	15	171	3
37	703	2018	6	13	171	3
37	703	2018	7	9	171	3
37	703	2018	8	12	171	3
37	703	2018	9	10	171	3
37	703	2018	10	29	171	3
37	703	2018	11	28	171	3
37	703	2018	12	17	171	3
38	703	2017	1	0	56	2
38	703	2017	2	0	56	2
38	703	2017	3	1	56	2
38	703	2017	4	4	56	2
38	703	2017	5	0	56	2
38	703	2017	6	2	56	2
38	703	2017	7	3	56	2
38	703	2017	8	8	56	2
38	703	2017	9	17	56	2
38	703	2017	10	4	56	2
38	703	2017	11	4	56	2
38	703	2017	12	13	56	2
39	703	2018	1	5	10	2
39	703	2018	2	0	10	2
39	703	2018	3	0	10	2
39	703	2018	4	1	10	2
39	703	2018	5	0	10	2
39	703	2018	6	1	10	2
39	703	2018	7	0	10	2
39	703	2018	8	1	10	2
39	703	2018	9	0	10	2
39	703	2018	10	1	10	2
39	703	2018	11	1	10	2
39	703	2018	12	0	10	2
40	703	2017	1	0	54	1
40	703	2017	2	0	54	1
40	703	2017	3	1	54	1
40	703	2017	4	6	54	1
40	703	2017	5	0	54	1
40	703	2017	6	5	54	1
40	703	2017	7	5	54	1
40	703	2017	8	8	54	1
40	703	2017	9	8	54	1
40	703	2017	10	0	54	1
40	703	2017	11	0	54	1
40	703	2017	12	21	54	1
41	703	2018	1	11	67	1
41	703	2018	2	3	67	1
41	703	2018	3	0	67	1
41	703	2018	4	0	67	1
41	703	2018	5	0	67	1
41	703	2018	6	7	67	1
41	703	2018	7	15	67	1
41	703	2018	8	2	67	1
41	703	2018	9	3	67	1
41	703	2018	10	13	67	1
41	703	2018	11	6	67	1
41	703	2018	12	7	67	1
42	701	2017	1	1	16	4
42	701	2017	2	0	16	4
42	701	2017	3	2	16	4
42	701	2017	4	0	16	4
42	701	2017	5	1	16	4
42	701	2017	6	3	16	4
42	701	2017	7	0	16	4
42	701	2017	8	2	16	4
42	701	2017	9	0	16	4
42	701	2017	10	4	16	4
42	701	2017	11	1	16	4
42	701	2017	12	2	16	4
43	701	2018	1	1	28	4
43	701	2018	2	2	28	4
43	701	2018	3	5	28	4
43	701	2018	4	0	28	4
43	701	2018	5	2	28	4
43	701	2018	6	2	28	4
43	701	2018	7	4	28	4
43	701	2018	8	4	28	4
43	701	2018	9	0	28	4
43	701	2018	10	2	28	4
43	701	2018	11	4	28	4
43	701	2018	12	2	28	4
44	701	2017	1	19	129	3
44	701	2017	2	9	129	3
44	701	2017	3	12	129	3
44	701	2017	4	10	129	3
44	701	2017	5	18	129	3
44	701	2017	6	10	129	3
44	701	2017	7	17	129	3
44	701	2017	8	4	129	3
44	701	2017	9	4	129	3
44	701	2017	10	17	129	3
44	701	2017	11	8	129	3
44	701	2017	12	1	129	3
45	701	2018	1	7	109	3
45	701	2018	2	9	109	3
45	701	2018	3	16	109	3
45	701	2018	4	4	109	3
45	701	2018	5	7	109	3
45	701	2018	6	2	109	3
45	701	2018	7	6	109	3
45	701	2018	8	6	109	3
45	701	2018	9	12	109	3
45	701	2018	10	11	109	3
45	701	2018	11	20	109	3
45	701	2018	12	9	109	3
46	701	2017	1	3	41	2
46	701	2017	2	0	41	2
46	701	2017	3	3	41	2
46	701	2017	4	2	41	2
46	701	2017	5	0	41	2
46	701	2017	6	3	41	2
46	701	2017	7	11	41	2
46	701	2017	8	0	41	2
46	701	2017	9	0	41	2
46	701	2017	10	5	41	2
46	701	2017	11	4	41	2
46	701	2017	12	10	41	2
47	701	2018	1	8	34	2
47	701	2018	2	1	34	2
47	701	2018	3	11	34	2
47	701	2018	4	4	34	2
47	701	2018	5	1	34	2
47	701	2018	6	0	34	2
47	701	2018	7	0	34	2
47	701	2018	8	1	34	2
47	701	2018	9	0	34	2
47	701	2018	10	2	34	2
47	701	2018	11	2	34	2
47	701	2018	12	4	34	2
48	701	2017	1	13	70	1
48	701	2017	2	1	70	1
48	701	2017	3	9	70	1
48	701	2017	4	6	70	1
48	701	2017	5	7	70	1
48	701	2017	6	8	70	1
48	701	2017	7	4	70	1
48	701	2017	8	1	70	1
48	701	2017	9	1	70	1
48	701	2017	10	4	70	1
48	701	2017	11	7	70	1
48	701	2017	12	9	70	1
49	701	2018	1	12	89	1
49	701	2018	2	6	89	1
49	701	2018	3	20	89	1
49	701	2018	4	9	89	1
49	701	2018	5	10	89	1
49	701	2018	6	2	89	1
49	701	2018	7	2	89	1
49	701	2018	8	2	89	1
49	701	2018	9	2	89	1
49	701	2018	10	5	89	1
49	701	2018	11	10	89	1
49	701	2018	12	9	89	1
50	402	2017	1	1	63	1
50	402	2017	2	1	63	1
50	402	2017	3	1	63	1
50	402	2017	4	5	63	1
50	402	2017	5	2	63	1
50	402	2017	6	4	63	1
50	402	2017	7	4	63	1
50	402	2017	8	4	63	1
50	402	2017	9	4	63	1
50	402	2017	10	5	63	1
50	402	2017	11	4	63	1
50	402	2017	12	28	63	1
51	402	2018	1	9	57	1
51	402	2018	2	2	57	1
51	402	2018	3	2	57	1
51	402	2018	4	3	57	1
51	402	2018	5	21	57	1
51	402	2018	6	6	57	1
51	402	2018	7	10	57	1
51	402	2018	8	0	57	1
51	402	2018	9	2	57	1
51	402	2018	10	0	57	1
51	402	2018	11	2	57	1
51	402	2018	12	0	57	1
52	402	2017	1	1	28	2
52	402	2017	2	0	28	2
52	402	2017	3	0	28	2
52	402	2017	4	5	28	2
52	402	2017	5	2	28	2
52	402	2017	6	2	28	2
52	402	2017	7	1	28	2
52	402	2017	8	4	28	2
52	402	2017	9	4	28	2
52	402	2017	10	1	28	2
52	402	2017	11	2	28	2
52	402	2017	12	6	28	2
53	402	2018	1	0	33	2
53	402	2018	2	0	33	2
53	402	2018	3	0	33	2
53	402	2018	4	4	33	2
53	402	2018	5	10	33	2
53	402	2018	6	3	33	2
53	402	2018	7	13	33	2
53	402	2018	8	0	33	2
53	402	2018	9	1	33	2
53	402	2018	10	0	33	2
53	402	2018	11	2	33	2
53	402	2018	12	0	33	2
54	402	2017	1	12	143	3
54	402	2017	2	10	143	3
54	402	2017	3	9	143	3
54	402	2017	4	14	143	3
54	402	2017	5	23	143	3
54	402	2017	6	5	143	3
54	402	2017	7	20	143	3
54	402	2017	8	15	143	3
54	402	2017	9	1	143	3
54	402	2017	10	7	143	3
54	402	2017	11	17	143	3
54	402	2017	12	10	143	3
55	402	2018	1	9	208	3
55	402	2018	2	9	208	3
55	402	2018	3	20	208	3
55	402	2018	4	18	208	3
55	402	2018	5	28	208	3
55	402	2018	6	23	208	3
55	402	2018	7	33	208	3
55	402	2018	8	24	208	3
55	402	2018	9	15	208	3
55	402	2018	10	21	208	3
55	402	2018	11	7	208	3
55	402	2018	12	1	208	3
56	402	2017	1	0		4
56	402	2017	2	0		4
56	402	2017	3	0		4
56	402	2017	4	0		4
56	402	2017	5	0		4
56	402	2017	6	0		4
56	402	2017	7	0		4
56	402	2017	8	0		4
56	402	2017	9	0		4
56	402	2017	10	0		4
56	402	2017	11	0		4
56	402	2017	12	0		4
57	402	2018	1	0	2	4
57	402	2018	2	0	2	4
57	402	2018	3	0	2	4
57	402	2018	4	1	2	4
57	402	2018	5	0	2	4
57	402	2018	6	0	2	4
57	402	2018	7	1	2	4
57	402	2018	8	0	2	4
57	402	2018	9	0	2	4
57	402	2018	10	0	2	4
57	402	2018	11	0	2	4
57	402	2018	12	0	2	4
58	405	2017	1	61	386	1
58	405	2017	2	23	386	1
58	405	2017	3	13	386	1
58	405	2017	4	56	386	1
58	405	2017	5	27	386	1
58	405	2017	6	40	386	1
58	405	2017	7	39	386	1
58	405	2017	8	17	386	1
58	405	2017	9	53	386	1
58	405	2017	10	18	386	1
58	405	2017	11	18	386	1
58	405	2017	12	21	386	1
59	405	2018	1	79	441	1
59	405	2018	2	21	441	1
59	405	2018	3	32	441	1
59	405	2018	4	38	441	1
59	405	2018	5	58	441	1
59	405	2018	6	31	441	1
59	405	2018	7	10	441	1
59	405	2018	8	12	441	1
59	405	2018	9	21	441	1
59	405	2018	10	42	441	1
59	405	2018	11	50	441	1
59	405	2018	12	47	441	1
60	405	2017	1	41	271	2
60	405	2017	2	23	271	2
60	405	2017	3	14	271	2
60	405	2017	4	37	271	2
60	405	2017	5	21	271	2
60	405	2017	6	24	271	2
60	405	2017	7	29	271	2
60	405	2017	8	14	271	2
60	405	2017	9	29	271	2
60	405	2017	10	19	271	2
60	405	2017	11	5	271	2
60	405	2017	12	15	271	2
61	405	2018	1	64	326	2
61	405	2018	2	18	326	2
61	405	2018	3	18	326	2
61	405	2018	4	37	326	2
61	405	2018	5	35	326	2
61	405	2018	6	30	326	2
61	405	2018	7	16	326	2
61	405	2018	8	9	326	2
61	405	2018	9	14	326	2
61	405	2018	10	18	326	2
61	405	2018	11	27	326	2
61	405	2018	12	40	326	2
62	405	2017	1	33	350	3
62	405	2017	2	15	350	3
62	405	2017	3	11	350	3
62	405	2017	4	39	350	3
62	405	2017	5	22	350	3
62	405	2017	6	41	350	3
62	405	2017	7	49	350	3
62	405	2017	8	48	350	3
62	405	2017	9	37	350	3
62	405	2017	10	26	350	3
62	405	2017	11	18	350	3
62	405	2017	12	11	350	3
63	405	2018	1	46	453	3
63	405	2018	2	25	453	3
63	405	2018	3	37	453	3
63	405	2018	4	47	453	3
63	405	2018	5	92	453	3
63	405	2018	6	26	453	3
63	405	2018	7	21	453	3
63	405	2018	8	7	453	3
63	405	2018	9	12	453	3
63	405	2018	10	26	453	3
63	405	2018	11	48	453	3
63	405	2018	12	66	453	3
64	405	2017	1	1	2	4
64	405	2017	2	0	2	4
64	405	2017	3	0	2	4
64	405	2017	4	0	2	4
64	405	2017	5	0	2	4
64	405	2017	6	1	2	4
64	405	2017	7	0	2	4
64	405	2017	8	0	2	4
64	405	2017	9	0	2	4
64	405	2017	10	0	2	4
64	405	2017	11	0	2	4
64	405	2017	12	0	2	4
65	405	2018	1	1	1	4
65	405	2018	2	0	1	4
65	405	2018	3	0	1	4
65	405	2018	4	0	1	4
65	405	2018	5	0	1	4
65	405	2018	6	0	1	4
65	405	2018	7	0	1	4
65	405	2018	8	0	1	4
65	405	2018	9	0	1	4
65	405	2018	10	0	1	4
65	405	2018	11	0	1	4
65	405	2018	12	0	1	4
66	403	2017	1	5	31	1
66	403	2017	2	4	31	1
66	403	2017	3	2	31	1
66	403	2017	4	2	31	1
66	403	2017	5	3	31	1
66	403	2017	6	2	31	1
66	403	2017	7	2	31	1
66	403	2017	8	5	31	1
66	403	2017	9	3	31	1
66	403	2017	10	1	31	1
66	403	2017	11	2	31	1
66	403	2017	12	0	31	1
67	403	2018	1	0	72	1
67	403	2018	2	1	72	1
67	403	2018	3	1	72	1
67	403	2018	4	4	72	1
67	403	2018	5	16	72	1
67	403	2018	6	5	72	1
67	403	2018	7	9	72	1
67	403	2018	8	8	72	1
67	403	2018	9	10	72	1
67	403	2018	10	5	72	1
67	403	2018	11	7	72	1
67	403	2018	12	6	72	1
68	403	2017	1	2	13	2
68	403	2017	2	4	13	2
68	403	2017	3	1	13	2
68	403	2017	4	0	13	2
68	403	2017	5	2	13	2
68	403	2017	6	1	13	2
68	403	2017	7	0	13	2
68	403	2017	8	0	13	2
68	403	2017	9	0	13	2
68	403	2017	10	1	13	2
68	403	2017	11	2	13	2
68	403	2017	12	0	13	2
69	403	2018	1	0	31	2
69	403	2018	2	0	31	2
69	403	2018	3	0	31	2
69	403	2018	4	1	31	2
69	403	2018	5	6	31	2
69	403	2018	6	1	31	2
69	403	2018	7	5	31	2
69	403	2018	8	5	31	2
69	403	2018	9	5	31	2
69	403	2018	10	0	31	2
69	403	2018	11	2	31	2
69	403	2018	12	6	31	2
70	403	2017	1	3	109	3
70	403	2017	2	21	109	3
70	403	2017	3	25	109	3
70	403	2017	4	8	109	3
70	403	2017	5	14	109	3
70	403	2017	6	13	109	3
70	403	2017	7	6	109	3
70	403	2017	8	2	109	3
70	403	2017	9	9	109	3
70	403	2017	10	1	109	3
70	403	2017	11	7	109	3
70	403	2017	12	0	109	3
71	403	2018	1	0	79	3
71	403	2018	2	4	79	3
71	403	2018	3	13	79	3
71	403	2018	4	3	79	3
71	403	2018	5	7	79	3
71	403	2018	6	9	79	3
71	403	2018	7	3	79	3
71	403	2018	8	12	79	3
71	403	2018	9	7	79	3
71	403	2018	10	9	79	3
71	403	2018	11	9	79	3
71	403	2018	12	3	79	3
72	403	2017	1	0	1	4
72	403	2017	2	0	1	4
72	403	2017	3	0	1	4
72	403	2017	4	0	1	4
72	403	2017	5	0	1	4
72	403	2017	6	1	1	4
72	403	2017	7	0	1	4
72	403	2017	8	0	1	4
72	403	2017	9	0	1	4
72	403	2017	10	0	1	4
72	403	2017	11	0	1	4
72	403	2017	12	0	1	4
73	403	2018	1	0	5	4
73	403	2018	2	0	5	4
73	403	2018	3	4	5	4
73	403	2018	4	0	5	4
73	403	2018	5	0	5	4
73	403	2018	6	0	5	4
73	403	2018	7	0	5	4
73	403	2018	8	1	5	4
73	403	2018	9	0	5	4
73	403	2018	10	0	5	4
73	403	2018	11	0	5	4
73	403	2018	12	0	5	4
